# Supplementary material
Source: PubMed Central journal article supplement (PMC7202372)
Supplement: NIHMS1500254-supplement-Supplemental_tables.pdf [file NIHMS1500254-supplement-Supplemental_tables.pdf]

## ONLINE SUPPLEMENT

### **PREDICTION OF AMBULATORY HYPERTENSION BASED ON CLINIC BLOOD PRESSURE PERCENTILE IN ADOLESCENTS: THE SHIP AHOY STUDY**

Gilad Hamdani<sup>1</sup>, Joseph T. Flynn<sup>2</sup>, Richard C. Becker<sup>3</sup>, Stephen R. Daniels<sup>4</sup>, Bonita Falkner<sup>5</sup>,  
Coral D. Hanevold<sup>2</sup>, Julie R. Ingelfinger<sup>6</sup>, Marc B. Lande<sup>7</sup>, Lisa J. Martin<sup>1</sup>, Kevin E. Meyers<sup>8</sup>,  
Mark Mitsnefes<sup>1</sup>, Bernard Rosner<sup>9</sup>, Joshua A. Samuels<sup>10</sup>, and Elaine M. Urbina<sup>1</sup>.

<sup>1</sup>Cincinnati Children's Hospital Medical Center, Cincinnati, Ohio; <sup>2</sup>Seattle Children's Hospital, Seattle, Washington; <sup>3</sup>University of Cincinnati College of Medicine; <sup>4</sup>Children's Hospital Colorado, Aurora, Colorado; <sup>5</sup>Thomas Jefferson University Hospital, Philadelphia, Pennsylvania; <sup>6</sup>Mass General Hospital for Children, Boston, Massachusetts; <sup>7</sup>University of Rochester Medical Center, Rochester, New York; <sup>8</sup>Children's Hospital of Philadelphia, Philadelphia, Pennsylvania; <sup>9</sup>Harvard TH Chan School of Public Health, Boston, Massachusetts; <sup>10</sup>University of Texas Health Sciences Center, Houston, Texas.

#### **Corresponding Author:**

Elaine M Urbina  
Cincinnati Children's Hospital Medical Center  
3333 Burnet Avenue, MLC 7002  
Cincinnati, OH, 45229  
Telephone: 513-636-8265; Fax: 513-636-0162  
Email: Elaine.Urbina@cchmc.org

Table S1. Prediction of Sleep and Wake and/or Systolic Ambulatory HTN Based on Different Clinic SBP Parameters

| <b>SBP parameter</b>     |                                   | <b>Sensitivity</b> | <b>Specificity</b> |
|--------------------------|-----------------------------------|--------------------|--------------------|
| <b>Sleep</b>             |                                   |                    |                    |
| <b>Fourth Report</b>     | <b>80<sup>th</sup> %ile</b>       | 82.5%              | 54.7%              |
|                          | <b>85<sup>th</sup> %ile</b>       | 77.5%              | 67.0%              |
|                          | <b>90<sup>th</sup> %ile</b>       | 67.5%              | 76.9%              |
|                          | <b>SBP Pre-HTN</b>                | 90.0%              | 49.3%              |
| <b>2017 CPG</b>          | <b>80<sup>th</sup> %ile</b>       | 85.0%              | 47.3%              |
|                          | <b>85<sup>th</sup> %ile</b>       | 82.5%              | 56.7%              |
|                          | <b>90<sup>th</sup> Percentile</b> | 75.0%              | 69.5%              |
|                          | <b>Elevated SBP</b>               | 87.5%              | 48.0%              |
| <b>Wake and/or Sleep</b> |                                   |                    |                    |
| <b>Fourth Report</b>     | <b>80<sup>th</sup> %ile</b>       | 80.4%              | 56.9%              |
|                          | <b>85<sup>th</sup> %ile</b>       | 76.8%              | 70.2%              |
|                          | <b>90<sup>th</sup> %ile</b>       | 62.5%              | 78.7%              |
|                          | <b>SBP Pre-HTN</b>                | 85.7%              | 51.1%              |
| <b>2017 CPG</b>          | <b>80<sup>th</sup> %ile</b>       | 85.7%              | 50.0%              |
|                          | <b>85<sup>th</sup> %ile</b>       | 80.4%              | 59.0%              |
|                          | <b>90<sup>th</sup> %ile</b>       | 73.2%              | 72.3%              |
|                          | <b>Elevated SBP</b>               | 83.9%              | 49.7%              |

Table S2. Prediction of Diastolic Ambulatory HTN Based on Different Clinic DBP Parameters

| <b>DBP parameter</b>     | <b>Sensitivity</b>          | <b>Specificity</b> |       |
|--------------------------|-----------------------------|--------------------|-------|
| <b>Wake</b>              |                             |                    |       |
| <b>Fourth Report</b>     | <b>80<sup>th</sup> %ile</b> | 87.1%              | 39.1% |
|                          | <b>85<sup>th</sup> %ile</b> | 87.1%              | 46.5% |
|                          | <b>90<sup>th</sup> %ile</b> | 80.6%              | 55.3% |
|                          | <b>95<sup>th</sup> %ile</b> | 67.7%              | 65.1% |
|                          | <b>DBP Pre-HTN</b>          | 87.1%              | 50.2% |
| <b>2017 CPG</b>          | <b>80<sup>th</sup> %ile</b> | 90.0%              | 34.1% |
|                          | <b>85<sup>th</sup> %ile</b> | 86.7%              | 41.1% |
|                          | <b>90<sup>th</sup> %ile</b> | 86.7%              | 48.6% |
|                          | <b>95<sup>th</sup> %ile</b> | 83.3%              | 59.8% |
|                          | <b>Elevated DBP</b>         | 87.1%              | 49.5% |
| <b>Sleep</b>             |                             |                    |       |
| <b>Fourth Report</b>     | <b>80<sup>th</sup> %ile</b> | 93.3%              | 39.6% |
|                          | <b>85<sup>th</sup> %ile</b> | 90.0%              | 46.7% |
|                          | <b>90<sup>th</sup> %ile</b> | 76.7%              | 54.7% |
|                          | <b>95<sup>th</sup> %ile</b> | 70.0%              | 65.1% |
|                          | <b>DBP Pre-HTN</b>          | 86.7%              | 50.0% |
| <b>2017 CPG</b>          | <b>80<sup>th</sup> %ile</b> | 93.3%              | 34.8% |
|                          | <b>85<sup>th</sup> %ile</b> | 93.3%              | 41.9% |
|                          | <b>90<sup>th</sup> %ile</b> | 90.0%              | 49.1% |
|                          | <b>95<sup>th</sup> %ile</b> | 76.7%              | 58.6% |
|                          | <b>Elevated DBP</b>         | 86.7%              | 49.3% |
| <b>Wake and/or Sleep</b> |                             |                    |       |
| <b>Fourth Report</b>     | <b>80<sup>th</sup> %ile</b> | 87.5%              | 41.3% |
|                          | <b>85<sup>th</sup> %ile</b> | 85.4%              | 49.0% |
|                          | <b>90<sup>th</sup> %ile</b> | 77.1%              | 57.7% |
|                          | <b>95<sup>th</sup> %ile</b> | 64.6%              | 66.8% |
|                          | <b>DBP Pre-HTN</b>          | 83.3%              | 52.6% |
| <b>2017 CPG</b>          | <b>80<sup>th</sup> %ile</b> | 89.4%              | 36.4% |
|                          | <b>85<sup>th</sup> %ile</b> | 87.2%              | 43.6% |
|                          | <b>90<sup>th</sup> %ile</b> | 85.1%              | 51.3% |
|                          | <b>95<sup>th</sup> %ile</b> | 76.6%              | 61.5% |
|                          | <b>Elevated DBP</b>         | 83.3%              | 51.8% |

Table S3. Clinic SBP 85th Percentile for Boys by Age and Height Percentile

| Age (y) |               | Height Percentile |       |       |       |       |       |       |
|---------|---------------|-------------------|-------|-------|-------|-------|-------|-------|
|         |               | 5%                | 10%   | 25%   | 50%   | 75%   | 90%   | 95%   |
| 5       | Height (in)   | 41.1              | 41.8  | 43.0  | 44.3  | 45.5  | 46.7  | 47.4  |
|         | Height (cm)   | 104.4             | 106.2 | 109.1 | 112.4 | 115.7 | 118.6 | 120.3 |
|         | SBP 85th %ile | 100.6             | 101.3 | 102.3 | 103.6 | 104.8 | 106   | 106.6 |
| 6       | Height (in)   | 43.4              | 44.2  | 45.4  | 46.8  | 48.2  | 49.4  | 50.2  |
|         | Height (cm)   | 110.3             | 112.2 | 115.3 | 118.9 | 122.4 | 125.6 | 127.5 |
|         | SBP 85th %ile | 102.0             | 102.8 | 104.0 | 105.5 | 106.9 | 108.1 | 108.8 |
| 7       | Height (in)   | 45.7              | 46.5  | 47.8  | 49.3  | 50.8  | 52.1  | 52.9  |
|         | Height (cm)   | 116.1             | 118   | 121.4 | 125.1 | 128.9 | 132.4 | 134.5 |
|         | SBP 85th %ile | 103.9             | 104.7 | 105.9 | 107.2 | 108.4 | 109.3 | 109.8 |
| 8       | Height (in)   | 47.8              | 48.6  | 50    | 51.6  | 53.2  | 54.6  | 55.5  |
|         | Height (cm)   | 121.4             | 123.5 | 127   | 131   | 135.1 | 138.8 | 141   |
|         | SBP 85th %ile | 104.9             | 105.6 | 106.6 | 107.8 | 108.9 | 109.9 | 110.5 |
| 9       | Height (in)   | 49.6              | 50.5  | 52    | 53.7  | 55.4  | 56.9  | 57.9  |
|         | Height (cm)   | 126.0             | 128.3 | 132.1 | 136.3 | 140.7 | 144.7 | 147.1 |
|         | SBP 85th %ile | 105.4             | 106.1 | 107.4 | 108.7 | 110.0 | 111.1 | 111.8 |
| 10      | Height (in)   | 51.3              | 52.2  | 53.8  | 55.6  | 57.4  | 59.1  | 60.1  |
|         | Height (cm)   | 130.2             | 132.7 | 136.7 | 141.3 | 145.9 | 150.1 | 152.7 |
|         | SBP 85th %ile | 106.9             | 107.7 | 108.9 | 110.2 | 111.4 | 112.7 | 113.5 |
| 11      | Height (in)   | 53.0              | 54.0  | 55.7  | 57.6  | 59.6  | 61.3  | 62.4  |
|         | Height (cm)   | 134.7             | 137.3 | 141.5 | 146.4 | 151.3 | 155.8 | 158.6 |
|         | SBP 85th %ile | 109               | 109.7 | 110.8 | 112.0 | 113.4 | 115.1 | 116.3 |
| 12      | Height (in)   | 55.2              | 56.3  | 58.1  | 60.1  | 62.2  | 64    | 65.2  |
|         | Height (cm)   | 140.3             | 143   | 147.5 | 152.7 | 157.9 | 162.6 | 165.5 |
|         | SBP 85th %ile | 111.3             | 111.9 | 112.9 | 114.5 | 116.8 | 119.3 | 120.8 |
| 13      | Height (in)   | 57.9              | 59.1  | 61    | 63.1  | 65.2  | 67.1  | 68.3  |
|         | Height (cm)   | 147.0             | 150.0 | 154.9 | 160.3 | 165.7 | 170.5 | 173.4 |
|         | SBP 85th %ile | 113.6             | 114.3 | 116.2 | 119.1 | 121.9 | 123.8 | 124.6 |
| 14      | Height (in)   | 60.6              | 61.8  | 63.8  | 65.9  | 68.0  | 69.8  | 70.9  |
|         | Height (cm)   | 153.8             | 156.9 | 162.0 | 167.5 | 172.7 | 177.4 | 180.1 |
|         | SBP 85th %ile | 116.5             | 118.1 | 121.1 | 123.6 | 125.0 | 125.9 | 126.4 |
| 15      | Height (in)   | 62.6              | 63.8  | 65.7  | 67.8  | 69.8  | 71.5  | 72.5  |
|         | Height (cm)   | 159.0             | 162.0 | 166.9 | 172.2 | 177.2 | 181.6 | 184.2 |
|         | SBP 85th %ile | 120.8             | 122.4 | 124.4 | 125.7 | 126.8 | 127.7 | 128.3 |
| 16      | Height (in)   | 63.8              | 64.9  | 66.8  | 68.8  | 70.7  | 72.4  | 73.4  |
|         | Height (cm)   | 162.1             | 165.0 | 169.6 | 174.6 | 179.5 | 183.8 | 186.4 |
|         | SBP 85th %ile | 123.8             | 124.9 | 126.3 | 127.5 | 128.6 | 129.6 | 130.2 |
| 17      | Height (in)   | 64.5              | 65.5  | 67.3  | 69.2  | 71.1  | 72.8  | 73.8  |
|         | Height (cm)   | 163.8             | 166.5 | 170.9 | 175.8 | 180.7 | 184.9 | 187.5 |
|         | SBP 85th %ile | 125.8             | 126.7 | 128.0 | 129.2 | 130.4 | 131.5 | 132.1 |

Table S4. Clinic SBP 85th Percentile for Girls by Age and Height Percentile

| Age (y)   |               | Height Percentile |       |       |       |       |       |       |
|-----------|---------------|-------------------|-------|-------|-------|-------|-------|-------|
|           |               | 5%                | 10%   | 25%   | 50%   | 75%   | 90%   | 95%   |
| <b>5</b>  | Height (in)   | 40.8              | 41.5  | 42.6  | 43.9  | 45.2  | 46.5  | 47.3  |
|           | Height (cm)   | 103.6             | 105.3 | 108.2 | 111.5 | 114.9 | 118.1 | 120.0 |
|           | SBP 85th %ile | 100.5             | 101.1 | 102.1 | 103.3 | 104.5 | 105.6 | 106.4 |
| <b>6</b>  | Height (in)   | 43.3              | 44.0  | 45.2  | 46.6  | 48.1  | 49.4  | 50.3  |
|           | Height (cm)   | 110.0             | 111.8 | 114.9 | 118.4 | 122.1 | 125.6 | 127.7 |
|           | SBP 85th %ile | 101.5             | 102.2 | 103.3 | 104.6 | 106.0 | 107.3 | 108.1 |
| <b>7</b>  | Height (in)   | 45.6              | 46.4  | 47.7  | 49.2  | 50.7  | 52.1  | 53.0  |
|           | Height (cm)   | 115.9             | 117.8 | 121.1 | 124.9 | 128.8 | 132.5 | 134.7 |
|           | SBP 85th %ile | 102.8             | 103.5 | 104.7 | 106.1 | 107.5 | 108.7 | 109.4 |
| <b>8</b>  | Height (in)   | 47.6              | 48.4  | 49.8  | 51.4  | 53.0  | 54.5  | 55.5  |
|           | Height (cm)   | 121.0             | 123.0 | 126.5 | 130.6 | 134.7 | 138.5 | 140.9 |
|           | SBP 85th %ile | 104.1             | 104.8 | 106.0 | 107.3 | 108.5 | 109.8 | 110.5 |
| <b>9</b>  | Height (in)   | 49.3              | 50.2  | 51.7  | 53.4  | 55.1  | 56.7  | 57.7  |
|           | Height (cm)   | 125.3             | 127.6 | 131.3 | 135.6 | 140.1 | 144.1 | 146.6 |
|           | SBP 85th %ile | 105.3             | 106.0 | 107.2 | 108.4 | 109.7 | 110.8 | 111.6 |
| <b>10</b> | Height (in)   | 51.1              | 52.0  | 53.7  | 55.5  | 57.4  | 59.1  | 60.2  |
|           | Height (cm)   | 129.7             | 132.2 | 136.3 | 141.0 | 145.8 | 150.2 | 152.8 |
|           | SBP 85th %ile | 107.0             | 107.7 | 108.9 | 110.1 | 111.4 | 112.7 | 113.6 |
| <b>11</b> | Height (in)   | 53.4              | 54.5  | 56.2  | 58.2  | 60.2  | 61.9  | 63.0  |
|           | Height (cm)   | 135.6             | 138.3 | 142.8 | 147.8 | 152.8 | 157.3 | 160.0 |
|           | SBP 85th %ile | 109.6             | 110.2 | 111.3 | 112.6 | 114.2 | 116.1 | 117.3 |
| <b>12</b> | Height (in)   | 56.2              | 57.3  | 59.0  | 60.9  | 62.8  | 64.5  | 65.5  |
|           | Height (cm)   | 142.8             | 145.5 | 149.9 | 154.8 | 159.6 | 163.8 | 166.4 |
|           | SBP 85th %ile | 112.4             | 113.1 | 114.2 | 115.9 | 117.9 | 119.3 | 119.8 |
| <b>13</b> | Height (in)   | 58.3              | 59.3  | 60.9  | 62.7  | 64.5  | 66.1  | 67.0  |
|           | Height (cm)   | 148.1             | 150.6 | 154.7 | 159.2 | 163.7 | 167.8 | 170.2 |
|           | SBP 85th %ile | 114.5             | 115.2 | 116.6 | 118.4 | 119.7 | 120.4 | 120.8 |
| <b>14</b> | Height (in)   | 59.3              | 60.2  | 61.8  | 63.5  | 65.2  | 66.8  | 67.7  |
|           | Height (cm)   | 150.6             | 153.0 | 156.9 | 161.3 | 165.7 | 169.7 | 172.1 |
|           | SBP 85th %ile | 115.6             | 116.4 | 117.8 | 119.3 | 120.2 | 120.7 | 121.1 |
| <b>15</b> | Height (in)   | 59.7              | 60.6  | 62.2  | 63.9  | 65.6  | 67.2  | 68.1  |
|           | Height (cm)   | 151.7             | 154.0 | 157.9 | 162.3 | 166.7 | 170.6 | 173.0 |
|           | SBP 85th %ile | 116.6             | 117.3 | 118.7 | 119.9 | 120.6 | 121.2 | 121.6 |
| <b>16</b> | Height (in)   | 59.9              | 60.8  | 62.4  | 64.1  | 65.8  | 67.3  | 68.3  |
|           | Height (cm)   | 152.1             | 154.5 | 158.4 | 162.8 | 167.1 | 171.1 | 173.4 |
|           | SBP 85th %ile | 117.6             | 118.2 | 119.5 | 120.6 | 121.3 | 121.9 | 122.3 |
| <b>17</b> | Height (in)   | 60.0              | 60.9  | 62.5  | 64.2  | 65.9  | 67.4  | 68.4  |
|           | Height (cm)   | 152.4             | 154.7 | 158.7 | 163.0 | 167.4 | 171.1 | 173.7 |
|           | SBP 85th %ile | 118.6             | 119.2 | 120.4 | 121.4 | 122.2 | 122.8 | 123.2 |
